# Supplementary material
Source: PubMed Central journal article supplement (PMC2864656)
Supplement: Supp_Data.pdf [file Supp_Data.pdf]

SUPPLEMENTAL TABLE 1. SELENIUM CONTENT OF DIETS USED IN THE STUDY

| <i>Diet</i>                           | <i>ppm Selenium, expected<sup>†</sup></i> | <i>ppm Selenium, measured wet</i> | <i>ppm Selenium, measured dry</i> |
|---------------------------------------|-------------------------------------------|-----------------------------------|-----------------------------------|
| Selenium deficient, (-)Se             | 0.02                                      | <0.020                            | 0.026                             |
| Selenium supplemented,<br>0.1 ppm Se  | 0.1                                       | 0.108                             | 0.113                             |
| Selenium supplemented,<br>0.15 ppm Se | 0.15                                      | 0.152                             | 0.163                             |
| Selenium supplemented,<br>0.4 ppm Se  | 0.4                                       | 0.389                             | 0.413                             |
| Selenium supplemented,<br>2.25 ppm Se | 2.25                                      | 2.07                              | 2.18                              |
| NIH 1*                                | –                                         | 0.429                             | 0.466                             |
| NIH 2*                                | –                                         | 0.392                             | 0.431                             |
| Harlan Teklad rodent chow             | –                                         | 0.387                             | 0.421                             |

\*Two different batches of the same diet.

<sup>†</sup>Expected based on the amount of Se added to the Se-deficient diet (or background Se in the case of Se-deficient diet).
